# Supplementary material for: Wnt-dependent assembly of supermolecular Dishevelled-3-based complexes
Source: Oxford University Press journal article supplement (doi:10.1242/jcs.075275), 2010-10-13
Supplement: jcs075275figs1.pdf [file jcs075275figs1.pdf]

Dvl1

Dvl2

2000

kDa ( $M_r$ )

2000

kDa ( $M_r$ )

18 20 22 24 26 30 34 38  
16 19 21 23 25 28 32 36

18 20 22 24 26 30 34 38  
16 19 21 23 25 28 32 36

(-) Wnt3a

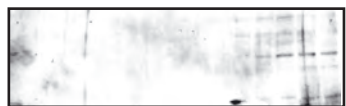

Dvl1

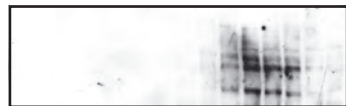

Dvl2

(+) Wnt3a, 30 min

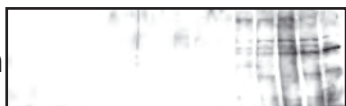

Dvl1

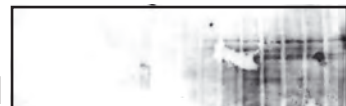

Dvl2

(+) Wnt3a, 1 hr

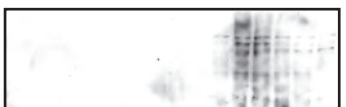

Dvl1

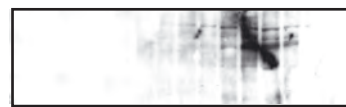

Dvl2

(+) Wnt3a, 2 hr

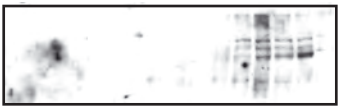

Dvl1

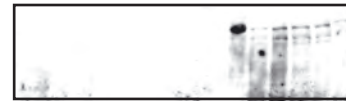

Dvl2

Dvl1

669

440

158

75 kDa ( $M_r$ )

43 46 49 52 55 58 61 64 67 70 73 76 79 82

85 88 91 94 97 100 03 06 09 12 15 18 21 24

(-) Wnt3a

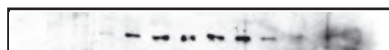

Dvl1

(+) Wnt3a, 30 min

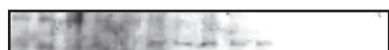

Dvl1

(+) Wnt3a, 1 hr

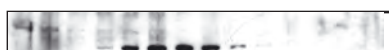

Dvl1

Dvl2

(-) Wnt3a

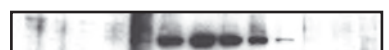

Dvl2

(+) Wnt3a, 30 min

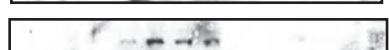

Dvl2

(+) Wnt3a, 1 hr

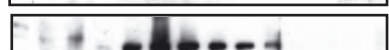

Dvl2
