# Supplementary figures and images for: Wnt-dependent assembly of supermolecular Dishevelled-3-based complexes
Source: Oxford University Press journal article supplement (doi:10.1242/jcs.075275), 2010-10-13

**A**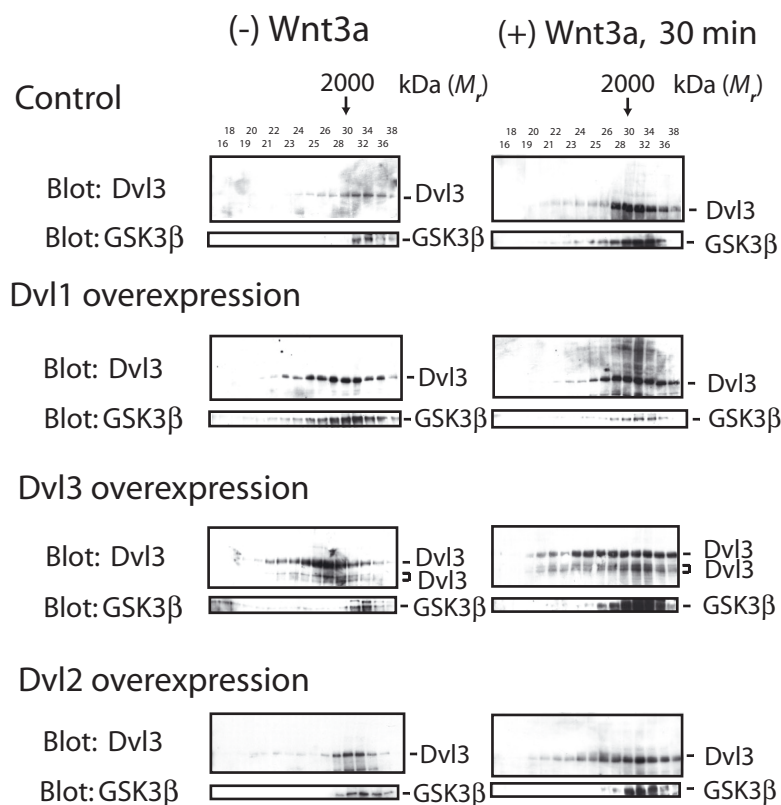**B**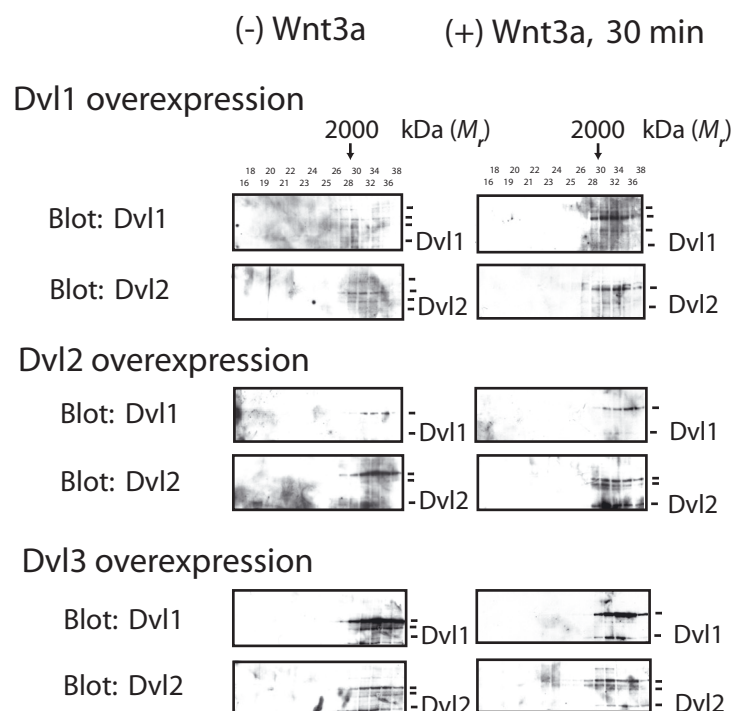**C**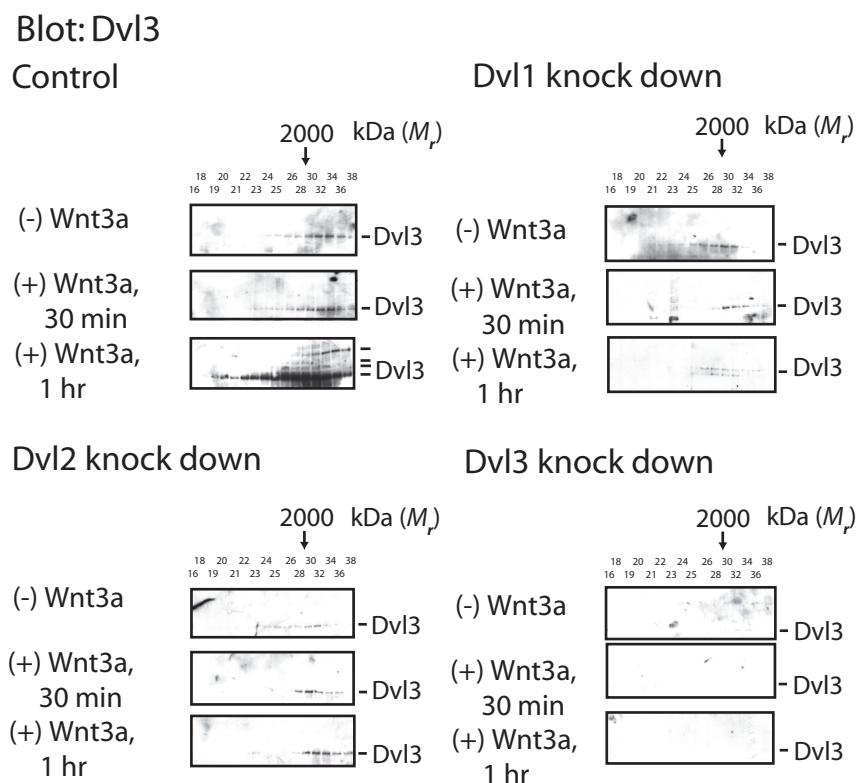**D**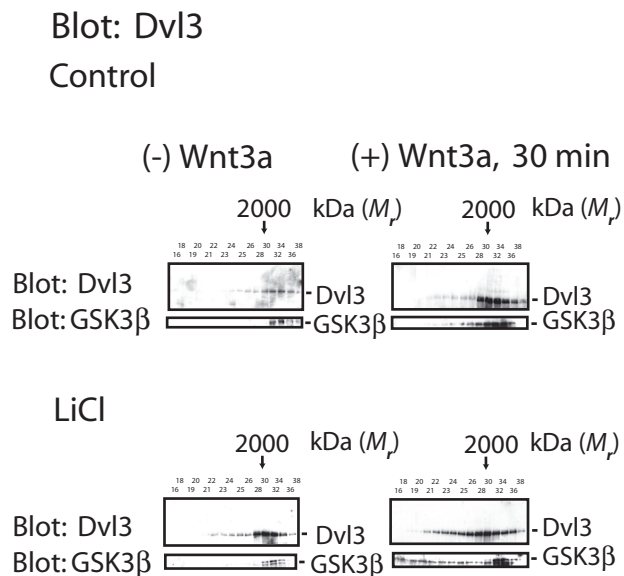

Supplement: jcs075275figs4.pdf [file jcs075275figs4.pdf]
